# Supplementary material for: Biomolecular proteomics discloses ATP synthase as the main target of the natural glycoside deglucoruscin
Source: Royal Society of Chemistry journal article supplement (doi:10.1039/c6mb00460a), 2016-07-25
Supplement: c6mb00460a1.pdf [file c6mb00460a1.pdf]

## Biomolecular proteomics discloses ATP synthase as main target of the natural glycoside deglucoruscin.

Federica del Gaudio,<sup>a,b,c</sup> Carmen Festa,<sup>d</sup> Matteo Mozzicafreddo,<sup>e</sup> Michele Vasaturo,<sup>a</sup> Agostino Casapullo,<sup>a</sup> Simona De Marino,<sup>d</sup> Raffaele Riccio<sup>a</sup> and Maria Chiara Monti<sup>a\*</sup>

<sup>a</sup> Dipartimento di Farmacia, Università degli Studi di Salerno, Via Giovanni Paolo II, 132, 84084 Fisciano, Italy;

<sup>b</sup> PhD Program in Drug Discovery and Development, Università degli Studi di Salerno, Via Giovanni Paolo II 132, I-84084 Fisciano (SA), Italy;

<sup>c</sup> Farmaceutici Damor S.p.A, Via E. Scaglione 27, 80145 Naples, Italy

<sup>d</sup> Department of Pharmacy, University of Naples "Federico II", Via D. Montesano, 49, I-80131 Naples, Italy

<sup>e</sup> School of Biosciences and Veterinary Medicine, University of Camerino, via Gentile III da Varano, 62032 Camerino, Italy.

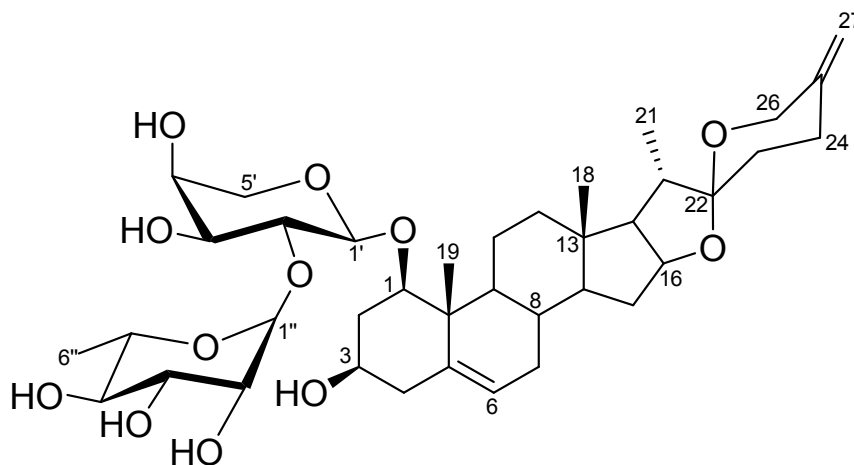

**Table S1.**  $^1\text{H}$  and  $^{13}\text{C}$  NMR data ( $\text{CD}_3\text{OD}$ , 400 and 100 MHz) of **DGR**

| Position              | $\delta_{\text{H}}^{\text{a}}$             | $\delta_{\text{C}}^{\text{a}}$ |
|-----------------------|--------------------------------------------|--------------------------------|
| 1                     | 3.35 ovl                                   | 84.6                           |
| 2                     | 1.67 ovl, 2.09 m                           | 37.3                           |
| 3                     | 3.33 ovl                                   | 69.2                           |
| 4                     | 2.19 m, 2.25 ovl                           | 43.5                           |
| 5                     | -                                          | 139.6                          |
| 6                     | 5.55 br d (5.5)                            | 125.9                          |
| 7                     | 1.52 ovl, 1.96 m                           | 32.7                           |
| 8                     | 1.55 ovl                                   | 34.0                           |
| 9                     | 1.23 m                                     | 51.5                           |
| 10                    | -                                          | 43.5                           |
| 11                    | 1.40 ovl, 2.55 ovl                         | 24.8                           |
| 12                    | 1.22 m, 1.65 m                             | 41.1                           |
| 13                    | -                                          | 41.2                           |
| 14                    | 1.15 m                                     | 57.9                           |
| 15                    | 1.30 m, 1.98 m                             | 32.9                           |
| 16                    | 4.43 m                                     | 82.5                           |
| 17                    | 1.74 ovl                                   | 64.1                           |
| 18                    | 0.82 s                                     | 17.1                           |
| 19                    | 1.09 s                                     | 15.3                           |
| 20                    | 1.90 m                                     | 42.9                           |
| 21                    | 0.94 d (6.9)                               | 14.9                           |
| 22                    | -                                          | 110.7                          |
| 23                    | 1.71 ovl                                   | 34.1                           |
| 24                    | 2.24 ovl, 2.53 ovl                         | 29.5                           |
| 25                    | -                                          | 145.2                          |
| 26                    | 3.82 d (11.8) 4.26 ovl                     | 65.8                           |
| 27                    | 4.73 br s, 4.76 br s                       | 108.9                          |
| $\alpha\text{-L-Ara}$ |                                            |                                |
| 1'                    | 4.26 d (7.6)                               | 101.0                          |
| 2'                    | 3.69 ovl                                   | 75.6                           |
| 3'                    | 3.63 dd (9.5, 3.0)                         | 76.1                           |
| 4'                    | 3.74 ovl                                   | 70.8                           |
| 5'                    | 3.48 dd (12.0, 3.0)<br>3.85 dd (12.0, 2.0) | 67.4                           |
| $\alpha\text{-L-Rha}$ |                                            |                                |
| 1''                   | 5.28 br d (1.2)                            | 101.6                          |
| 2''                   | 3.87 ovl                                   | 72.4                           |
| 3''                   | 3.68 ovl                                   | 72.1                           |
| 4''                   | 3.37 t (9.6)                               | 74.2                           |
| 5''                   | 4.07 m                                     | 69.7                           |
| 6''                   | 1.24 d (6.1)                               | 18.4                           |

Ovl: overlapped signals; <sup>a</sup>Coupling constants are in parentheses and given in hertz.  
 $^1\text{H}$  and  $^{13}\text{C}$  assignments aided by COSY, HSQC and HMBC experiments.

**Table S2:** Proteins Identified as DGR partners in two different experiments. The list has been obtained comparing the proteins eluted from DGR modified resin and control matrix after cutting the entire gel lane in few slices .

| Accession         | Score      | Mass         | Matches  | Match(sig) | Seq.     | Seq(sig) | emPAI      | Description                                                    |
|-------------------|------------|--------------|----------|------------|----------|----------|------------|----------------------------------------------------------------|
| ACTB_HUMAN        | 1451       | 42052        | 66       | 61         | 10       | 8        | 1.73       | Actin, cytoplasmic 1                                           |
| TBB4B_HUMAN       | 1244       | 50255        | 58       | 55         | 10       | 10       | 2.18       | Tubulin beta-4B chain                                          |
| TBA1B_HUMAN       | 949        | 50804        | 43       | 35         | 10       | 9        | 1.55       | Tubulin alpha-1B chain                                         |
| ACTA_HUMAN        | 728        | 42381        | 29       | 24         | 8        | 6        | 1.11       | Actin, aortic smooth muscle                                    |
| TBA4A_HUMAN       | 587        | 50634        | 37       | 29         | 9        | 8        | 1.31       | Tubulin alpha-4A chain                                         |
| SERA_HUMAN        | 426        | 57356        | 13       | 12         | 6        | 6        | 0.74       | D-3-phosphoglycerate dehydrogenase                             |
| <b>ATPA_HUMAN</b> | <b>249</b> | <b>59828</b> | <b>8</b> | <b>8</b>   | <b>3</b> | <b>3</b> | <b>0.3</b> | <b>ATP synthase subunit alpha, mitochondrial</b>               |
| EFTU_HUMAN        | 208        | 49852        | 6        | 5          | 3        | 3        | 0.37       | Elongation factor Tu, mitochondrial                            |
| 4F2_HUMAN         | 201        | 68180        | 5        | 3          | 3        | 2        | 0.17       | 4F2 cell-surface antigen heavy chain                           |
| AAAT_HUMAN        | 160        | 57018        | 9        | 5          | 3        | 2        | 0.2        | Neutral amino acid transporter B(0)                            |
| BZW1_HUMAN        | 128        | 48184        | 9        | 6          | 5        | 4        | 0.55       | Basic leucine zipper and W2 domain-containing protein 1        |
| DCD_HUMAN         | 126        | 11391        | 5        | 4          | 2        | 2        | 1.49       | Dermcidin                                                      |
| LAMP1_HUMAN       | 123        | 45367        | 4        | 4          | 1        | 1        | 0.12       | Lysosome-associated membrane glycoprotein 1                    |
| KPYM_HUMAN        | 110        | 58470        | 6        | 4          | 4        | 3        | 0.31       | Pyruvate kinase PKM                                            |
| RSSA_HUMAN        | 107        | 32947        | 4        | 3          | 2        | 1        | 0.17       | 40S ribosomal protein SA                                       |
| BASI_HUMAN        | 102        | 42573        | 4        | 4          | 1        | 1        | 0.13       | Basigin                                                        |
| UGDH_HUMAN        | 90         | 55674        | 1        | 1          | 1        | 1        | 0.1        | UDP-glucose 6-dehydrogenase                                    |
| QCR1_HUMAN        | 75         | 53297        | 1        | 1          | 1        | 1        | 0.1        | Cytochrome b-c1 complex subunit 1, mitochondrial               |
| QCR2_HUMAN        | 74         | 48584        | 1        | 1          | 1        | 1        | 0.11       | Cytochrome b-c1 complex subunit 2, mitochondrial               |
| ACADV_HUMAN       | 67         | 70745        | 4        | 2          | 4        | 2        | 0.16       | Very long-chain specific acyl-CoA dehydrogenase, mitochondrial |
| ECHB_HUMAN        | 65         | 51547        | 3        | 2          | 2        | 1        | 0.11       | Trifunctional enzyme subunit beta, mitochondrial               |
| HORN_HUMAN        | 56         | 283140       | 8        | 5          | 5        | 3        | 0.06       | Hornerin                                                       |
| APMAP_HUMAN       | 55         | 46622        | 2        | 1          | 2        | 1        | 0.12       | Adipocyte plasma membrane-associated protein                   |
| GPDM_HUMAN        | 52         | 81315        | 7        | 4          | 4        | 3        | 0.22       | Glycerol-3-phosphate dehydrogenase, mitochondrial              |
| <b>ATPB_HUMAN</b> | <b>51</b>  | <b>56525</b> | <b>2</b> | <b>1</b>   | <b>2</b> | <b>1</b> | <b>0.1</b> | <b>ATP synthase subunit beta, mitochondrial</b>                |

  

| Accession         | Score      | Mass         | Matches   | Match(sig) | Seq.      | Seq(sig) | emPAI       | Description                                      |
|-------------------|------------|--------------|-----------|------------|-----------|----------|-------------|--------------------------------------------------|
| TBB5_HUMAN        | 884        | 50095        | 30        | 29         | 11        | 10       | 2.21        | Tubulin beta chain                               |
| TBA1B_HUMAN       | 818        | 50804        | 48        | 33         | 12        | 10       | 1.84        | Tubulin alpha-1B chain                           |
| TBB4B_HUMAN       | 807        | 50255        | 29        | 27         | 11        | 10       | 2.19        | Tubulin beta-4B chain                            |
| <b>ATPB_HUMAN</b> | <b>559</b> | <b>56525</b> | <b>28</b> | <b>21</b>  | <b>12</b> | <b>9</b> | <b>1.56</b> | <b>ATP synthase subunit beta, mitochondrial</b>  |
| <b>ATPA_HUMAN</b> | <b>525</b> | <b>59828</b> | <b>29</b> | <b>21</b>  | <b>10</b> | <b>9</b> | <b>1.22</b> | <b>ATP synthase subunit alpha, mitochondrial</b> |
| TBA4A_HUMAN       | 358        | 50634        | 34        | 18         | 10        | 7        | 1.08        | Tubulin alpha-4A chain                           |
| ARF1_HUMAN        | 249        | 20741        | 6         | 5          | 2         | 2        | 1.14        | ADP-ribosylation factor 1                        |
| RS10L_HUMAN       | 223        | 20279        | 6         | 5          | 2         | 1        | 0.3         | Putative 40S ribosomal protein S10-like          |
| SRP54_HUMAN       | 206        | 55953        | 7         | 6          | 5         | 4        | 0.46        | Signal recognition particle 54 kDa protein       |
| EF1A1_HUMAN       | 195        | 50451        | 8         | 5          | 4         | 3        | 0.37        | Elongation factor 1-alpha 1                      |
| ARF5_HUMAN        | 168        | 20631        | 7         | 5          | 2         | 2        | 1.15        | ADP-ribosylation factor 5                        |
| RL12_HUMAN        | 100        | 17979        | 6         | 4          | 2         | 1        | 0.34        | 60S ribosomal protein L12                        |
| LYSC_HUMAN        | 82         | 16982        | 2         | 2          | 1         | 1        | 0.36        | Lysozyme C                                       |
| FSCN1_HUMAN       | 74         | 55123        | 10        | 4          | 5         | 2        | 0.21        | Fascin                                           |
| UGDH_HUMAN        | 72         | 55674        | 6         | 3          | 4         | 2        | 0.21        | UDP-glucose 6-dehydrogenase                      |
| TCPB_HUMAN        | 67         | 57794        | 5         | 4          | 3         | 3        | 0.32        | T-complex protein 1 subunit beta                 |
| BASI_HUMAN        | 64         | 42573        | 2         | 2          | 1         | 1        | 0.13        | Basigin                                          |
| MIF_HUMAN         | 61         | 12639        | 1         | 1          | 1         | 1        | 0.51        | Macrophage migration inhibitory factor           |
| SORCN_HUMAN       | 56         | 21947        | 4         | 3          | 2         | 2        | 0.62        | Sorcin                                           |
| <b>ATPO_HUMAN</b> | <b>55</b>  | <b>23377</b> | <b>5</b>  | <b>3</b>   | <b>3</b>  | <b>3</b> | <b>0.97</b> | <b>ATP synthase subunit O, mitochondrial</b>     |
| TCPD_HUMAN        | 54         | 58401        | 3         | 2          | 3         | 2        | 0.2         | T-complex protein 1 subunit delta                |
| TRXR1_HUMAN       | 54         | 71832        | 1         | 1          | 1         | 1        | 0.08        | Thioredoxin reductase 1, cytoplasmic             |
| S10A7_HUMAN       | 51         | 11578        | 3         | 2          | 1         | 1        | 0.57        | Protein S100-A7                                  |

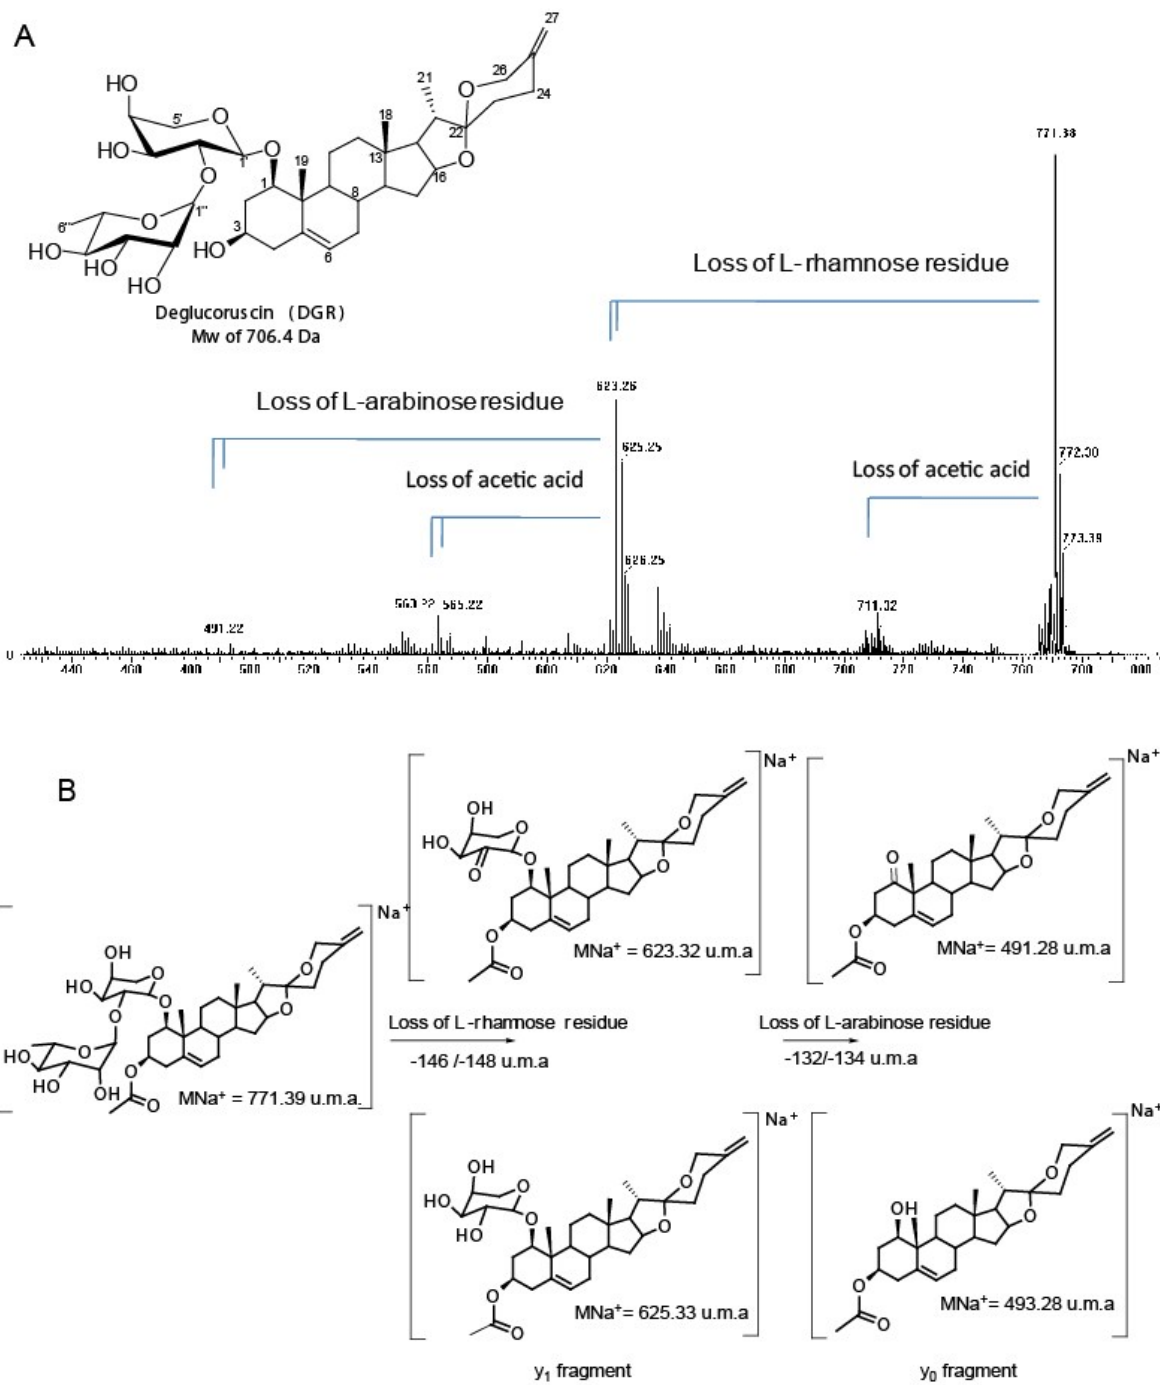

**Figure S1:** Panel A shows the MS/MS fragmentation of the acetylated DGR at  $m/z$  771.4. Panel B shows the postulated fragmentation pattern based on the observed ion peaks, in accordance with Domon and Costello.

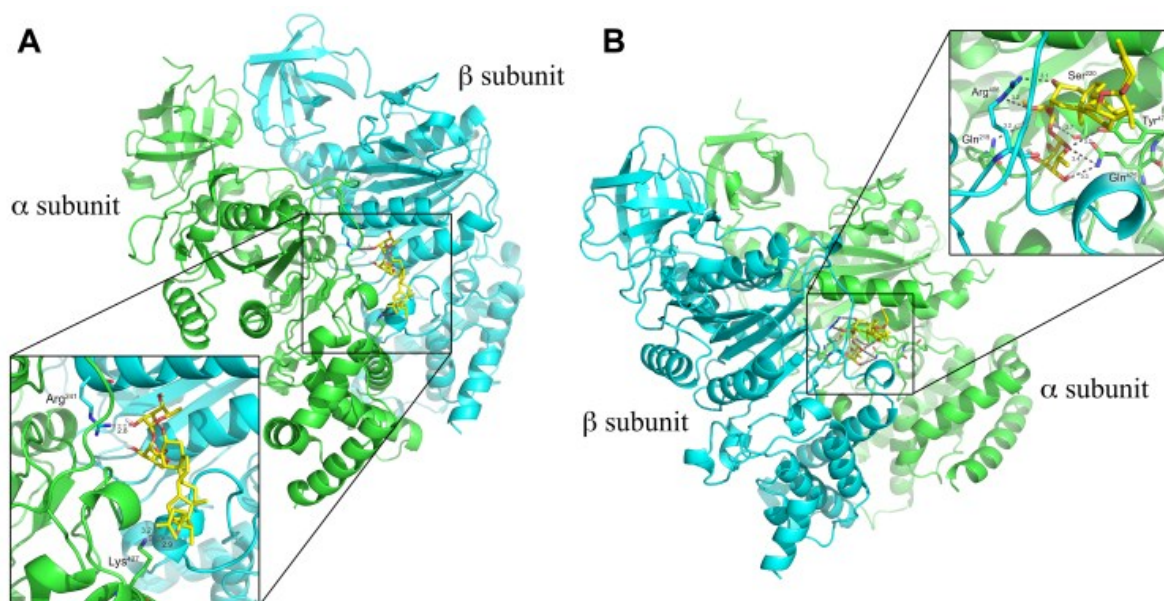

**Figure S2:** Molecular docking of DGR into the interface of tight binding subunits (A) and the interface of loose binding subunit (B). F1 subunits are shown as cartoons whereas the DGR is shown as sticks. In the boxes are reported amino acids involved in the H-bonds formation with the DGR.

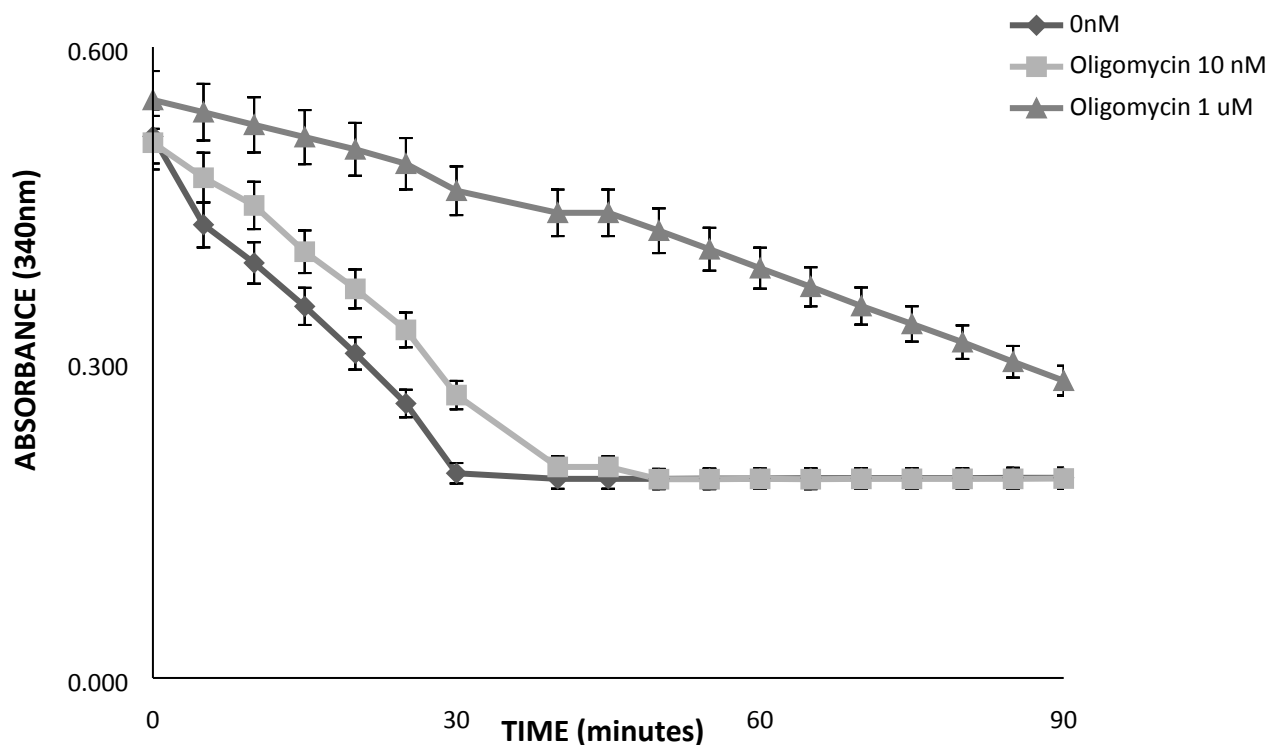

**Figure S3:** The ATP synthase inhibition by Oligomycin is reported measuring the intensity of the signal of  $\text{NADH}^+$  at 340 nm during 90 min of reaction. The intensity of this signal is inversely proportional to the ATP synthase activity.
